# Supplementary material for: Enhancing restoration success of rare plants in an arid-tropical climate through water-saving technologies: a case study of Scalesia affinis ssp. brachyloba in the Galapagos Islands
Source: PeerJ journal article supplement (doi:10.7717/peerj.16367), 2023-12-06
Supplement: Supplemental_Figure_1.pdf [file Supplemental_Figure_1.pdf]

## Predicted probabilities of survival

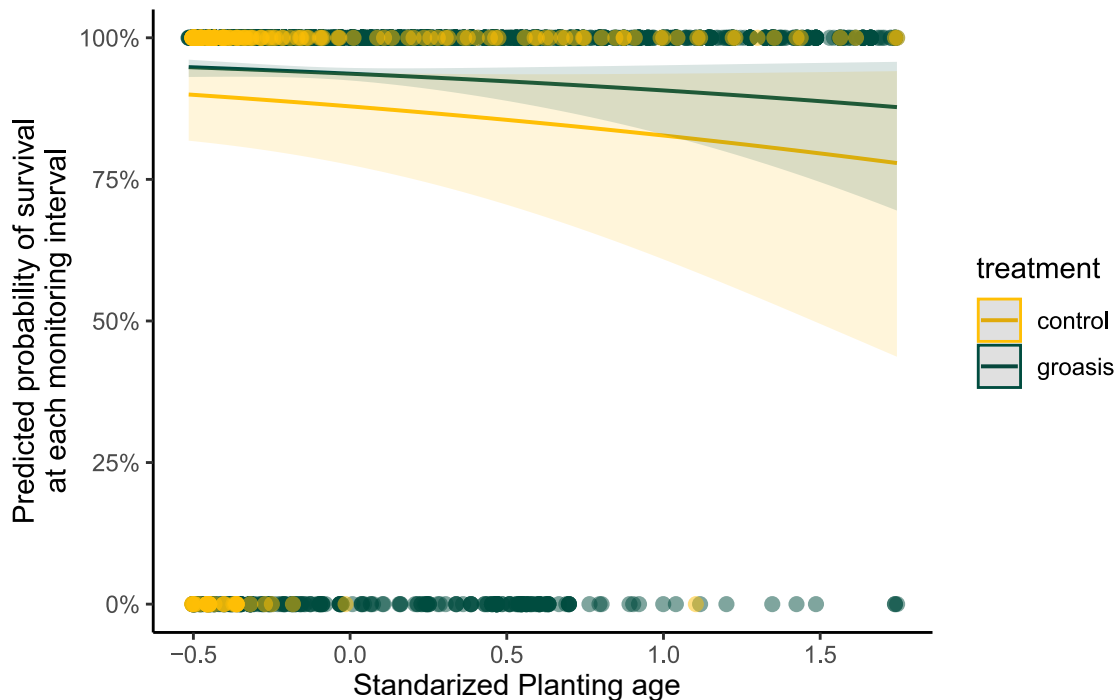

**Supplemental Figure 1. Predicted survival as function of standardized plant age (SPA).** Lower values of SPA indicate younger plants, while higher older ones. In dots: raw binary data of dead and alive plants.
