# Supplementary material for: Enhancing restoration success of rare plants in an arid-tropical climate through water-saving technologies: a case study of Scalesia affinis ssp. brachyloba in the Galapagos Islands
Source: PeerJ journal article supplement (doi:10.7717/peerj.16367), 2023-12-06
Supplement: Supplemental_Figure_2.pdf [file Supplemental_Figure_2.pdf]

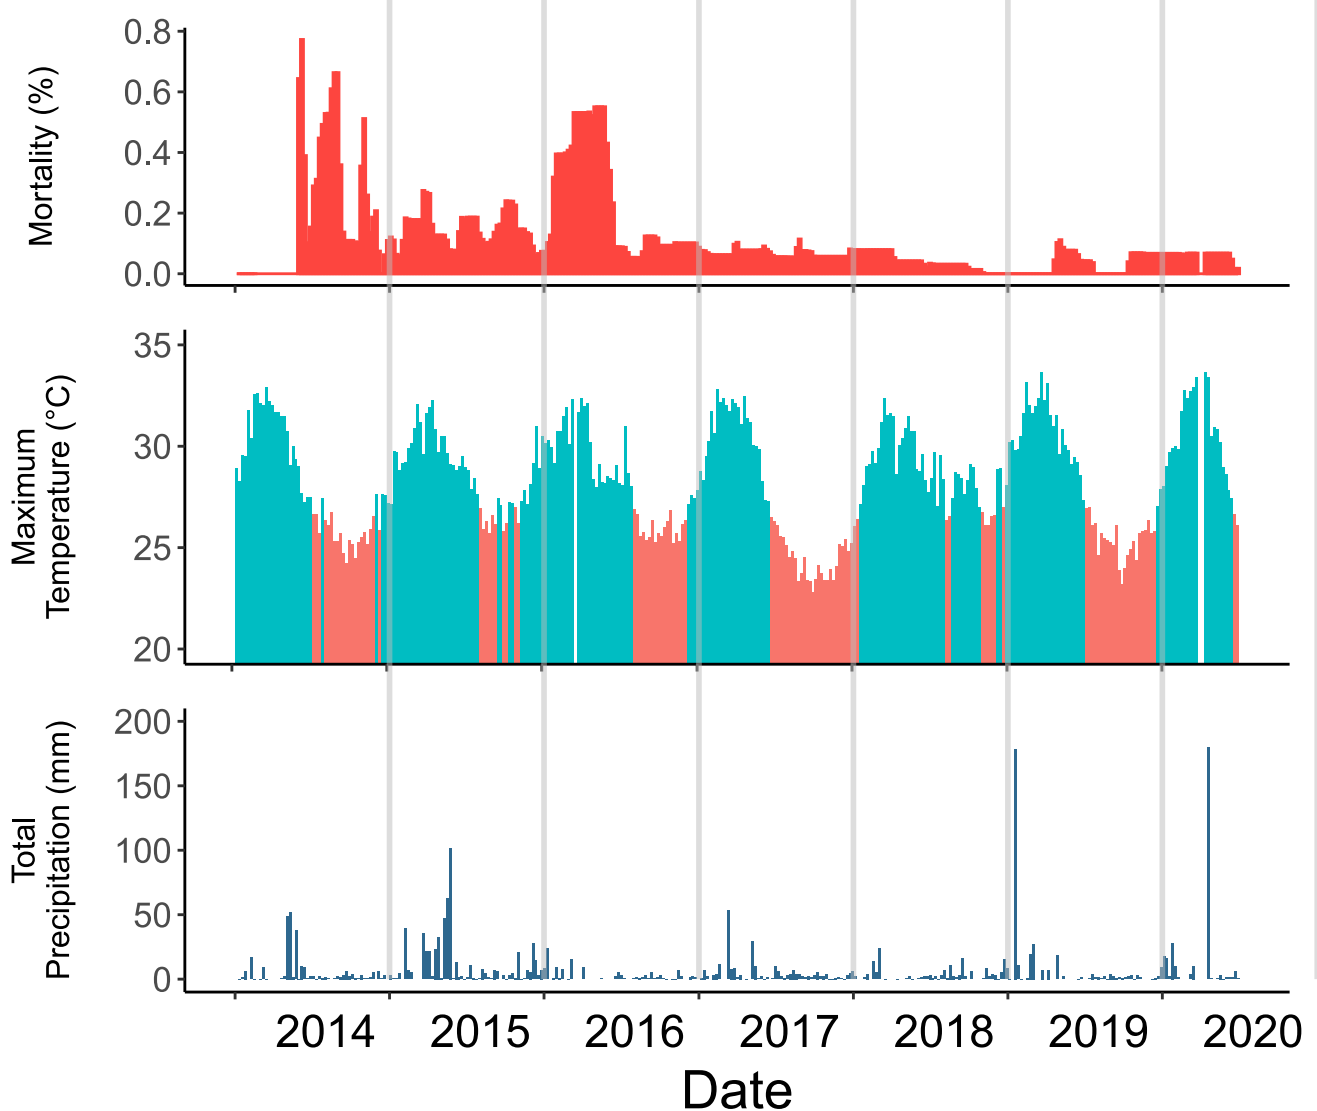

**Supplemental Figure 2. Summary of weekly data of the study.** (Upper graph) Estimated weekly mortality rate for *Scalesia affinis* ssp. *brachyloba* plantings on Santa Cruz Island; (Mid) Weekly maximum temperature (pink values = equal or lower than 27°C, blue values = higher than 27° C); (Lower graph) Weekly total precipitation in millimetres.
